# Supplementary material
Source: publisher site journal article supplement (https://www.dovepress.com/article/114566)
Supplement: Supplementary file 1 [file get_supplementary_file.php]

**Supplementary Table 1.** List of Independent Ethics Committees for ACLIFORM COPD

| <b>Country</b> | <b>Name and address of central IEC</b>                                                   | <b>Name and address of local IEC</b>                                                        |
|----------------|------------------------------------------------------------------------------------------|---------------------------------------------------------------------------------------------|
| Austria        | Ethikkommission der Medizinischen, Universität Graz,<br>Auenbruggerplatz 2, 8036 Graz    | Ethics committee of the Medical University<br>Graz, Auenbruggerplatz 2, 8036 Graz           |
|                |                                                                                          | Ethics committee of the country Salzburg,<br>Sebastian- Stief-Gasse 2, 5010 Salzburg        |
| Belgium        | Ethisch Comité UZA, Wilrijkstraat 10, Edegem 2650                                        | NA                                                                                          |
| Bulgaria       | Ethics Committee for Multicenter Trials (ECMT), 5, “Sveta<br>Nedelya” Square, 1000 Sofia | Local Ethics Committee UMHAT<br>Aleksandrovska EAD, 3, Georgi Sofiyski Str.<br>1431 Sofia   |
|                |                                                                                          | Local Ethics Committee SHATTPD-Ruse<br>EOOD, 1, Aleya Lilia Str. 7002 Ruse                  |
|                |                                                                                          | Local Ethics Committee SHATPFD-Sofia<br>District EOOD, 309, “Slivnitsa” Blvd, 1234<br>Sofia |
|                |                                                                                          | Local Ethics Committee DCC Sveta Anna<br>EOOD, 1, Dimitar Mollov Str. 1709 Sofia            |
|                |                                                                                          | Local Ethics Committee DCC “Akta Medika”<br>EOOD, 60, “Nikola Petkov” Str., 5400 Sevlievo   |

|                |                                                                                                                                                                                                  |                                                                                                                                                   |
|----------------|--------------------------------------------------------------------------------------------------------------------------------------------------------------------------------------------------|---------------------------------------------------------------------------------------------------------------------------------------------------|
| Croatia        | Agency for Medicinal Product and Medical Devices of Croatia,<br>Central Ethics Committee, Ksaverska cesta 4, Zagreb, 10000                                                                       | NA                                                                                                                                                |
| Czech Republic | Multicentricka eticka komise Fakultni nemocnice u sv. Anny v<br>Brne, Vystavni 17/19, Brno, 656                                                                                                  | NA                                                                                                                                                |
| Denmark        | De Videnskabsetiske Komitéer for Region Hovedstaden,<br>Kongens Vænge 2, 3400 Hillerød                                                                                                           | NA                                                                                                                                                |
| Finland        | Keski-Suomen sairaanhoitopiiri, Eettinen toimikunta, Sairaan<br>hoitopiirin toimisto Rak. 6/2, Keskussairaalantie 19, 40620<br>Jyväskylä                                                         | NA                                                                                                                                                |
| France         | Comité de Protection des Personnes Sud Ouest et Outre Mer<br>III, Place Amélie Raba-Léon, Groupe Hospitalier Pellegrin –<br>Service de Pharmacologie Clinique, Bât 1 A, Bordeaux cedex,<br>33076 | NA                                                                                                                                                |
| Germany        | Landesärztekammer Rheinland-Pfalz, Postfach 29 26,<br>55019 Mainz                                                                                                                                | Landesamt für Gesundheit und Soziales Berlin,<br>Geschäftsstelle der Ethik-Kommission des<br>Landes Berlin, Fehrbelliner Platz 1, 10707<br>Berlin |
|                |                                                                                                                                                                                                  | Ethik-Kommission des Landes Sachsen-Anhalt,<br>Geschäftsstelle, Kühnauer Str. 70, 06846<br>Dessau-Roßlau                                          |

|  |  |                                                                                                                                                                   |
|--|--|-------------------------------------------------------------------------------------------------------------------------------------------------------------------|
|  |  | Ethik-Kommission der Ärztekammer Westfalen-Lippe und der Medizinischen Fakultät der Westfälischen Wilhelms-Universität Münster, Gartenstr. 210–214, 48147 Münster |
|  |  | Landesärztekammer Hessen, Ethikkommission, Im Vogelsang 3, 60488 Frankfurt am Main                                                                                |
|  |  | Sächsische Landesärztekammer, Ethikkommission, Schützenhöhe 16–18, 01099 Dresden                                                                                  |
|  |  | Ärztekammer Hamburg, Ethikkommission, Humboldtstr. 67a, 22083 Hamburg                                                                                             |
|  |  | Landesärztekammer Rheinland-Pfalz, Ethikkommission, Deutschhausplatz 3, 55116 Mainz                                                                               |
|  |  | Ärztekammer Nordrhein, Ethikkommission, Tersteegenstr. 9, 40474 Düsseldorf                                                                                        |
|  |  | Ethikkommission der Medizinischen Fakultät der Universität Rostock, Institut für Rechtsmedizin, St. Georg-Str. 108                                                |
|  |  | Ärztekammer Niedersachsen, Ethikkommission, Berliner Allee 20, 30175 Hannover                                                                                     |

|                   |                                                                                                                                                                                       |                                                                                                                                                                                          |
|-------------------|---------------------------------------------------------------------------------------------------------------------------------------------------------------------------------------|------------------------------------------------------------------------------------------------------------------------------------------------------------------------------------------|
|                   |                                                                                                                                                                                       | Bayerische Landesärztekammer,<br>Ethikkommission, Mühlbauerstr. 16, 81677<br>München                                                                                                     |
| Hungary           | Egészségügyi Tudományos Tanács Klinikai Farmakológiai<br>Etikai Bizottsága, Arany J. u. 6–8, Budapest, H-1051                                                                         | NA                                                                                                                                                                                       |
| Italy             | Comitato Etico Locale per la Sperimentazione Clinica dei<br>Medicinali dell'Azienda Ospedaliero ra Universitaria ria Senese<br>di Siena, c/o Farmacia AOUS Viale Bracci, Siena, 53100 | Comitato Etico Unico per la Provincia di Parma,<br>Via Gramsci, 14, Parma, 43100                                                                                                         |
|                   |                                                                                                                                                                                       | Comitato per la Sperimentazione Clinica<br>Medicinali dell'Azienda Ospedaliero<br>Universitaria Pisana di Pisa, Via Roma 67, Pisa,<br>56100                                              |
|                   |                                                                                                                                                                                       | Comitato Etico Locale per la Sperimentazione<br>Clinica dei Medicinali dell'Azienda Ospedaliero<br>ra Universitaria ria Senese di Siena, c/o<br>Farmacia AOUS Viale Bracci, Siena, 53100 |
|                   |                                                                                                                                                                                       | Comitato Etico dell'Azienda Ospedaliero<br>Universitaria S.Martino di Genova, Largo<br>Rosanna Benzi, 10, Genova, 16132                                                                  |
| Republic of Korea | NA                                                                                                                                                                                    | IRB of Ewha Womans University Mokdong<br>Hospital, 1071, Anyangcheon-ro,<br>Yangcheon-Ku, Seoul, 158-710                                                                                 |
|                   |                                                                                                                                                                                       | IRB of Korea University Anam Hospital, 73                                                                                                                                                |

|             |                                                                                            |                                                                                                              |
|-------------|--------------------------------------------------------------------------------------------|--------------------------------------------------------------------------------------------------------------|
|             |                                                                                            | Inchon-ro, Seongbuk-Gu, Seoul, 136-705                                                                       |
|             |                                                                                            | IRB of Hallym University Sacred Heart Hospital, 896 Pyeongchon-dong, Dongan-gu, Anyang-si, 431-070           |
|             |                                                                                            | IRB of The Catholic University of Korea, Seoul St.Mary's Hospital 222 Banpo-Daero, Seocho-gu, Seoul, 137-701 |
|             |                                                                                            | IRB of Soonchunhyang University Bucheon Hospital, 1174 Joong-dong, Wonmi-gu, Buchon-si, 420-767              |
|             |                                                                                            | IRB of Korea University Guro Hospital, 148 Gurodong-ro, Guro-Gu, Seoul, 152-703                              |
|             |                                                                                            | IRB of Yonsei University Wonju Christian Hospital, 20 Ilsan-Ro, Wonju-Si, 220-701                            |
|             |                                                                                            | IRB of Seoul National Hospital, 101 Daehak-ro Jongno-gu, Seoul, 110-744                                      |
| Netherlands | METC Catharina ziekenhuis, Michelangelo laan 2, Eindhoven, 5623 EJ                         | NA                                                                                                           |
| Poland      | Komisja Bioetyczna przy Instytucie Gruźlicy I Chorob Płuc, ul. Płocka 26, Warszawa, 01-138 | NA                                                                                                           |
| Romania     | Comisia Nationala de Etica, Str. Aviator Sanatescu Nr. 48,                                 | NA                                                                                                           |

|                    |                                                                                              |                                                                                                                              |
|--------------------|----------------------------------------------------------------------------------------------|------------------------------------------------------------------------------------------------------------------------------|
|                    | Bucuresti, Sector 1,01                                                                       |                                                                                                                              |
| Russian Federation | Ethical Council at the MoH of RF, 3 Rakhmanovsky Pereulok, Moscow, 127994                    | LEC at City Clinical Hospital #23 n.a. Medsantrud, 11, Yauzskaya str, Moscow, 109240                                         |
|                    |                                                                                              | LEC FA of HealthCare andSD StP Rheumatology Clinical Hosp.#25, 47, Piskarevsky prospect, St. Petersburg, 195067              |
|                    |                                                                                              | LEC at SRI of Therapy of Siberian branch of Russian Academy of Medical Sciences, 175/1, B.Bogatkova str, Novosibirsk, 630089 |
|                    |                                                                                              | LEC at StP SMU n.a. acad. I.P. Pavlov, 10, Rentgena str.Saint-Petersburg, 197101                                             |
|                    |                                                                                              | LEC at FSd ESMC of presed. RF City Hospital #17, Volynskaya, 7, Moscow, 119620                                               |
| Slovakia           | Fakultná nemocnica s poliklinikou F.D. Roosevelta, Nám. L. Svobodu 1, 975 17 Banská Bystrica | Nitriansky samosprávny kraj Úrad Nitrianskeho samosprávneho kraja Etická komisia, Štefánikova tr. 69, 949 01 Nitra           |
|                    |                                                                                              | Bratislavský samosprávny kraj, Úrad samosprávneho kraja, Etická komisia, Sabinovská 16, P.O. Box 106, 820 05 Bratislava 25   |
|                    |                                                                                              | Košický samosprávny kraj, Úrad Košického                                                                                     |

|              |    |                                                                                                                                                                  |
|--------------|----|------------------------------------------------------------------------------------------------------------------------------------------------------------------|
|              |    | samosprávneho kraja Etická komisia, Námestie Maratónu mieru 1, 042 66 Košice                                                                                     |
|              |    | NsP Sv. Jakuba, n.o., Bardejov, ul. Sv. Jakuba 21, 085 01 Bardejov                                                                                               |
|              |    | Fakultná nemocnica s poliklinikou F.D. Roosevelta, Nám. L. Svobodu 1, 975 17 Banská Bystrica                                                                     |
|              |    | EK-Narodny ustav TBC, pľucnych chorob a hrudnikovej chirurgie, Vysne Hagy, Vysne Hagy, 05984                                                                     |
|              |    | Nitriansky samosprávny kraj Úrad Nitrianskeho samosprávneho kraja Etická komisia, Štefánikova tr. 69, 949 01 Nitra                                               |
| South Africa | NA | Pharma Ethics, 123 Amcor Road, Lyttelton Manor 0157                                                                                                              |
|              |    | University of Cape Town Ethics Committee, Faculty of Health Sciences Research EC, E52-24 Old Main Building, Groote Schuur Hospital, Observatory, Cape Town, 7925 |
|              |    | University of Stellenbosch Ethics Committee, Faculty of Health Sciences, Francie van Zijl Drive, Cape Town, 7505                                                 |

|       |                                                                                                                                                                |                                                                                                                                           |
|-------|----------------------------------------------------------------------------------------------------------------------------------------------------------------|-------------------------------------------------------------------------------------------------------------------------------------------|
|       |                                                                                                                                                                | Pharma Ethics, 123 Amcor Road, Lyttelton Manor 0157                                                                                       |
|       |                                                                                                                                                                | University of Pretoria, Research Ethics Committee, 31 Bophelo Road, HW Snyman South Building, Level 2, Room 2:34, Pretoria, Gauteng, 0001 |
| Spain | CEIC Hospital Universitario Puerta de Hierro Majadahonda, Planta 1ª, Pasillo unidades, administrativas de servicios, c/ Manuel de Falla, 1, Majadahonda, 28222 | CEIC Institut Municipal d'Assistència Sanitària, C/ Doctor Aiguader, 88 Edifici PRBB Barcelona, 08003                                     |
|       |                                                                                                                                                                | Comité Ético de Investigación Clínica de Asturias, C/ Celestino Villamil, s/n Oviedo, 33006                                               |
|       |                                                                                                                                                                | CEIC Hospital virgen de la Macarena, Dirección: Avda. Dr. Fedriani, 3 – Unidad de Investigación 2ª planta Sevilla, 41071                  |
|       |                                                                                                                                                                | CEIC del Complejo Hospitalario de Cáceres, Avda. Pablo Naranjo s/n Caceres, 10003                                                         |
|       |                                                                                                                                                                | CEIC del IDIAP Jordi Gol i Gurina, Gran Via de les Corts Catalanes, 587 atico Barcelona, 08007                                            |
|       |                                                                                                                                                                | CEIC Hospital Germans Trias i Pujol, Ctra. Canyet, s/n Badalona, 08916,                                                                   |



|                |                                                                                                           |                                                                                                                                        |
|----------------|-----------------------------------------------------------------------------------------------------------|----------------------------------------------------------------------------------------------------------------------------------------|
|                |                                                                                                           | CEIC Hospital general Carlos Haya, Avda. Carlos Haya, s/n Málaga, 29010                                                                |
| Sweden         | Regionala etikprövningsnämnden i Lund, Box 133, Östra Vallgatan, 14/Östervångsvägen 1, Lund, 22100        | NA                                                                                                                                     |
| Ukraine        | Central Ethics Commission of the Ministry of Health of Ukraine, 5, Narodnogo Opolchennya St., Kyiv, 03680 | LEC "Kharkiv City Clinical Hospital # 13", 137, Gagarin Av. Kharkiv, 61035                                                             |
|                |                                                                                                           | LEC SI "National Institute of Phthisiology and Pulmonology named F.G.Yanovskyy of AMS of Ukr, 10, Amosova Str., Kyiv, 03680            |
| United Kingdom | NRES Committee North West, 3rd Floor, Barlow House, 4 Minshull Street, Manchester, M1 3DZ                 | NRES Committee North West, 3rd Floor Barlow House, 4 Minshull Street, Manchester, M1 3DZ                                               |
|                |                                                                                                           | Bart 's Health NHS Trust, Joint Research and Development Office, Queen Mary Innovation Centre, 5 Walden Street, London, E1 2EF         |
|                |                                                                                                           | The Royal Wolverhampton Hospitals NHS Trust, Research & Development Directorate, The Chestnuts, Wolverhampton, West Midlands, WV10 0QP |
|                |                                                                                                           | Cambridge University Hospitals NHS Foundation Trust, Addenbrookes Hospital, Hills Road, Cambridge, CB2 0QQ                             |

|  |  |                                                                                                                                                                                                                    |
|--|--|--------------------------------------------------------------------------------------------------------------------------------------------------------------------------------------------------------------------|
|  |  | <p>Hull &amp; East Yorkshire Hospitals NHS Trust,<br/> Research &amp; Development Department, 2nd<br/> Floor Daisy Building, Castle Hill Hospital,<br/> Castle Road, Cottingham, East Yorkshire, HU16<br/> 5JQ</p> |
|  |  | <p>Bradford Teaching Hospitals NHS Foundation<br/> Trust, Bradford Royal Infirmary, Room 6,<br/> Pharmacy Stores, Gate 7, Smith Lane, Bradford<br/> West Yorkshire, BD9 6RJ</p>                                    |
|  |  | <p>NRES Committee West Midlands, Prospect<br/> House, Fishing Line Road, Enfield, Redditch,<br/> B97 6EW</p>                                                                                                       |
|  |  | <p>NRES Committee South Central, Building L27,<br/> University of Reading, London Road, Reading,<br/> RG1 5AQ</p>                                                                                                  |
|  |  | <p>North Tees &amp; Hartlepool NHS Foundation Trust<br/> – R&amp;D, Hardwick Road, Stockton on Tees,<br/> TS19 8PE</p>                                                                                             |
|  |  | <p>Wirral University Teaching Hospital NHS<br/> Foundation Trust, Arrowe Park Hospital,<br/> Arrowe Park Road, Upton, Wirral, CH49 5PE</p>                                                                         |
|  |  | <p>NHS Royal Victoria Infirmary, Queen Victoria<br/> Road, Newcastle Upon Tyne, Newcastle, NE1</p>                                                                                                                 |

|  |  |     |
|--|--|-----|
|  |  | 4LP |
|--|--|-----|

IEC, Independent Ethics Committee

**Supplementary Table 2.** List of Institutional Review Boards for AUGMENT COPD

|                                                                                                                                                                                                                                 |
|---------------------------------------------------------------------------------------------------------------------------------------------------------------------------------------------------------------------------------|
| List of Institutional Review Boards for AUGMENT COPD                                                                                                                                                                            |
| <p>Multi-region Ethics Committee<br/> c/- Ministry of Health<br/> PO Box 5013<br/> 1 the Terrace<br/> Wellington<br/> Phone: (04) 816 2655<br/> Fax: (04) 496 2343<br/> Email:<br/> multiregion_ethicscommittee@moh.govt.nz</p> |
| <p>IRB Services (Institutional Review Board Services) (central)<br/> 372 Hollandview Trail, Suite 300 Aurora,<br/> Ontario L4G 0A5<br/> Canada<br/> Phone: 905-727-7989<br/> Fax: 905-727-7990</p>                              |
| <p>Quorum Institutional Review Board (central)<br/> 1601 Fifth Avenue, Suite 1000<br/> Seattle, WA 98101<br/> Phone: 877-472-9883</p>                                                                                           |
| <p>Bellberry Human Research Ethics Committee<br/> 229 Greenhill Road<br/> Dulwich SA 5065<br/> Australia</p>                                                                                                                    |
| <p>Human Studies Subcommittee<br/> Bay Pines VA Healthcare System<br/> Research and Development Service (151)<br/> 10000 Bay Pines Blvd.<br/> Bay Pines, FL 33744<br/> (local)</p>                                              |

|                                                                                                                                                                                                               |
|---------------------------------------------------------------------------------------------------------------------------------------------------------------------------------------------------------------|
| <p>Flinders Clinical Research Ethics Committee<br/> Bedford Park SA 5042<br/> Australia</p>                                                                                                                   |
| <p>Western Institutional Review Board (local)<br/> 3535 7th Avenue SW<br/> Olympia, WA 98502</p>                                                                                                              |
| <p>St. Luke's IRB (local)<br/> 232 S. Woods Mill Rd.<br/> Chesterfield, MO 63017</p>                                                                                                                          |
| <p>Human Research Ethics Committee - D<br/> St Vincent's Health Melbourne<br/> PO Box 2900<br/> Fitzroy, Vic 3065<br/> Australia</p>                                                                          |
| <p>Royal Adelaide Hospital Research Ethics Committee<br/> North Terrace<br/> Adelaide SA 5000<br/> Australia</p>                                                                                              |
| <p>Concordia Hospital Ethics Committee (local)<br/> Concordia Hospital<br/> 1095 Concordia Avenue<br/> Winnipeg, Manitoba, Canada<br/> R2K 3S8</p>                                                            |
| <p>Hunter New England Human Research Ethics Committee<br/> Locked Bag 1<br/> New Lambton NSW 2305<br/> Australia</p>                                                                                          |
| <p>University of Saskatchewan Biomedical Ethics Review Board (local)<br/> Research Ethics Office<br/> University of Saskatchewan<br/> Box 5000 RPO University<br/> Saskatoon, Saskatchewan S7N 4J8 Canada</p> |

|                                                                                                                                                                                                           |
|-----------------------------------------------------------------------------------------------------------------------------------------------------------------------------------------------------------|
| <p>Telephone: 306-966-2975<br/> Facsimile: 306-966-2069</p>                                                                                                                                               |
| <p>Sparks Institutional Review Board (local)<br/> 1001 Towson Avenue<br/> PO Box 2406<br/> Fort Smith, AR 72902-2406</p>                                                                                  |
| <p>Kansas City Veterans Affairs Medical Center IRB (local)<br/> 4801 East Linwood Blvd.<br/> #151<br/> Kansas City, MO64128</p>                                                                           |
| <p>University of California San Diego<br/> Human Research Protections Program (local)<br/> 9500 Gilman Drive, Mail Code 0052<br/> La Jolla, California 92093-0052</p>                                     |
| <p>University of British Columbia, Clinical Research Ethics Board Office (local)<br/> Room 210, Research pavilion<br/> 828 West 10th Avenue<br/> Vancouver, British Columbia<br/> Canada<br/> V5Z 1L8</p> |
| <p>Mayo Clinic<br/> Office for Human Research Protection<br/> Institutional Review Board (IRB) (local)<br/> 201 Building Room 4-60<br/> 200 1st Street SW<br/> Rochester, MN 55905</p>                    |
| <p>Creighton University IRB (local)<br/> 2500 California Plaza<br/> Omaha, NE 68178</p>                                                                                                                   |
| <p>Institutional Review Board<br/> University of Texas Health Science<br/> Center at Tyler (local)</p>                                                                                                    |

|                                                                                                                                                           |
|-----------------------------------------------------------------------------------------------------------------------------------------------------------|
| 11937 US Highway 271<br>Tyler, TX 75708                                                                                                                   |
| University of Illinois College of Medicine of Peoria<br>Institutional Review Board (local)<br>One Illini Drive<br>Box 1649<br>Peoria, Illinois 61656-1649 |
| Mercy St. Vincent Medical Center Adult<br>Investigational Review Board (local)<br>2213 Cherry St.<br>Toledo, OH 43608                                     |
| Gold Coast Health Service District<br>Human Research Ethics Committee<br>108 Nerang Street<br>Southport Qld 4215<br>Australia                             |
| GLA-VA IRB (local)<br>11301 Wilshire Blvd.<br>Building 114 Room 325<br>Los Angeles, CA 90073                                                              |

**Supplementary Table 3.** Baseline demographics and patient characteristics of treatment groups by less symptomatic and more symptomatic patients according to baseline E-RS and BDI

|                                        | Acclidinium/formoterol 400/12 µg |                      |                    |                    | Acclidinium 400 µg   |                      |                    |                    | Formoterol 12 µg     |                      |                    |                    | Placebo              |                      |                    |                    |
|----------------------------------------|----------------------------------|----------------------|--------------------|--------------------|----------------------|----------------------|--------------------|--------------------|----------------------|----------------------|--------------------|--------------------|----------------------|----------------------|--------------------|--------------------|
|                                        | E-RS                             |                      | BDI                |                    | E-RS                 |                      | BDI                |                    | E-RS                 |                      | BDI                |                    | E-RS                 |                      | BDI                |                    |
| Demographic parameter                  | E-RS<br><10<br>n=230             | E-RS<br>≥10<br>n=480 | BDI<br>≥7<br>n=305 | BDI<br><7<br>n=393 | E-RS<br><10<br>n=252 | E-RS<br>≥10<br>n=455 | BDI<br>≥7<br>n=332 | BDI<br><7<br>n=371 | E-RS<br><10<br>n=267 | E-RS<br>≥10<br>n=434 | BDI<br>≥7<br>n=313 | BDI<br><7<br>n=385 | E-RS<br><10<br>n=180 | E-RS<br>≥10<br>n=337 | BDI<br>≥7<br>n=246 | BDI<br><7<br>n=262 |
| Age, mean (SD)                         | 63.1<br>(8.4)                    | 63.5<br>(8.6)        | 63.5<br>(8.5)      | 63.2<br>(8.6)      | 64.8<br>(8.1)        | 63.0<br>(8.6)        | 63.5<br>(7.8)      | 63.8<br>(9.1)      | 64.6<br>(7.9)        | 62.8<br>(8.2)        | 63.7<br>(8.4)      | 63.4<br>(8.2)      | 64.9<br>(8.1)        | 63.0<br>(8.7)        | 63.2<br>(8.3)      | 63.8<br>(8.8)      |
| Sex, male, %                           | 57.8                             | 60.4                 | 63.9               | 56.2               | 59.5                 | 62.6                 | 59.6               | 63.9               | 57.7                 | 60.1                 | 63.3               | 56.4               | 58.9                 | 59.6                 | 57.3               | 62.2               |
| <b>COPD severity (GOLD stages) (%)</b> |                                  |                      |                    |                    |                      |                      |                    |                    |                      |                      |                    |                    |                      |                      |                    |                    |
| Stage II (Moderate)                    | 70.0                             | 52.8                 | 69.1               | 49.6               | 65.2                 | 52.6                 | 64.8               | 49.5               | 71.4                 | 53.2                 | 66.5               | 55.7               | 64.4                 | 50.9                 | 63.8               | 49.2               |
| Stage III (Severe)                     | 30.0                             | 46.6                 | 30.9               | 49.6               | 34.8                 | 46.5                 | 34.2               | 50.3               | 27.8                 | 46.1                 | 32.6               | 43.8               | 35.6                 | 47.9                 | 35.4               | 50.0               |
| Current smoker, %                      | 45.7                             | 50.8                 | 47.9               | 50.4               | 43.7                 | 51.4                 | 47.0               | 50.1               | 43.1                 | 51.8                 | 48.6               | 49.1               | 46.1                 | 52.2                 | 56.1               | 45.4               |



|                                                           |                |                |                |                |                |                |                |                |                |                |                |                |                |                |                |                |
|-----------------------------------------------------------|----------------|----------------|----------------|----------------|----------------|----------------|----------------|----------------|----------------|----------------|----------------|----------------|----------------|----------------|----------------|----------------|
| <b>Smoking history, pack-years (SD)</b>                   | 47.7<br>(25.0) | 46.1<br>(25.0) | 45.7<br>(23.7) | 47.1<br>(26.1) | 47.3<br>(24.0) | 43.7<br>(23.3) | 45.0<br>(22.8) | 44.8<br>(24.4) | 45.9<br>(22.2) | 45.5<br>(22.2) | 45.1<br>(22.7) | 46.2<br>(22.2) | 50.2<br>(28.3) | 48.7<br>(25.9) | 47.8<br>(25.8) | 49.9<br>(26.4) |
| <b>No. exacerbations in previous 12 months, mean (SD)</b> | 0.3<br>(0.7)   | 0.5<br>(1.0)   | 0.4<br>(0.7)   | 0.5<br>(1.0)   | 0.3<br>(0.7)   | 0.5<br>(0.9)   | 0.4<br>(0.7)   | 0.5<br>(0.9)   | 0.3<br>(0.6)   | 0.5<br>(0.9)   | 0.3<br>(0.6)   | 0.5<br>(0.9)   | 0.3<br>(0.6)   | 0.4<br>(0.7)   | 0.2<br>(0.6)   | 0.4<br>(0.7)   |
| <b>Baseline post-dose FEV<sub>1</sub>, L, mean (SD)</b>   | 1.50<br>(0.51) | 1.34<br>(0.52) | 1.49<br>(0.52) | 1.31<br>(0.51) | 1.43<br>(0.52) | 1.35<br>(0.52) | 1.44<br>(0.53) | 1.31<br>(0.50) | 1.46<br>(0.51) | 1.35<br>(0.51) | 1.50<br>(0.52) | 1.31<br>(0.49) | 1.44<br>(0.53) | 1.36<br>(0.56) | 1.46<br>(0.54) | 1.32<br>(0.55) |
| <b>Baseline FVC, L, mean (SD)</b>                         | 2.9<br>(0.9)   | 2.8<br>(0.8)   | 3.0<br>(1.0)   | 2.7<br>(0.8)   | 2.9<br>(0.9)   | 2.8<br>(0.8)   | 2.9<br>(0.9)   | 2.8<br>(0.9)   | 2.9<br>(0.9)   | 2.8<br>(0.8)   | 3.0<br>(0.8)   | 2.7<br>(0.8)   | 2.9<br>(1.0)   | 2.8<br>(0.9)   | 3.0<br>(1.0)   | 2.8<br>(0.9)   |
| <b>FEV<sub>1</sub>/FVC, %, mean (SD)</b>                  | 49.7<br>(10.7) | 46.9<br>(10.5) | 48.3<br>(10.6) | 47.1<br>(10.7) | 47.7<br>(10.1) | 47.9<br>(11.2) | 49.3<br>(10.2) | 46.2<br>(11.0) | 49.1<br>(10.6) | 46.7<br>(10.8) | 49.3<br>(10.6) | 46.0<br>(10.7) | 48.3<br>(10.2) | 47.2<br>(11.2) | 49.0<br>(10.1) | 45.6<br>(11.5) |
| <b>E-RS total score at baseline (SD)</b>                  | 5.5<br>(2.9)   | 16.5<br>(4.9)  | 11.0<br>(6.0)  | 14.4<br>(6.9)  | 5.9<br>(2.7)   | 16.2<br>(4.6)  | 9.9<br>(5.4)   | 14.8<br>(6.3)  | 5.6<br>(2.9)   | 16.5<br>(4.4)  | 10.1<br>(6.3)  | 14.3<br>(6.3)  | 5.6<br>(2.9)   | 15.7<br>(4.5)  | 9.7<br>(5.4)   | 14.5<br>(6.1)  |
| <b>BDI score at baseline (SD)</b>                         | 7.28<br>(1.93) | 5.98<br>(2.01) | 8.2<br>(1.4)   | 5.0<br>(1.3)   | 7.53<br>(2.14) | 5.93<br>(1.95) | 8.2<br>(1.4)   | 4.9<br>(1.4)   | 7.51<br>(2.12) | 5.81<br>(2.00) | 8.4<br>(1.4)   | 4.9<br>(1.3)   | 7.48<br>(2.05) | 5.93<br>(2.16) | 8.2<br>(1.4)   | 4.8<br>(1.5)   |

BDI, Baseline Dyspnea Index; COPD, chronic obstructive pulmonary disease; E-RS, Evaluating Respiratory Symptoms; FEV<sub>1</sub>, forced expiratory volume in 1 second; FVC, forced vital capacity; GOLD, Global initiative for chronic Obstructive Lung Disease; SD, standard deviation
